# Supplementary material for: A homing mechanism for bone marrow-derived progenitor cell recruitment to the neovasculature
Source: JCI journal article supplement (doi:10.1172/jci24751), 2006-02-24
Supplement: sd1 [file 1]

Supplementary Figure 1

CMTMR  
CD34+  
cells

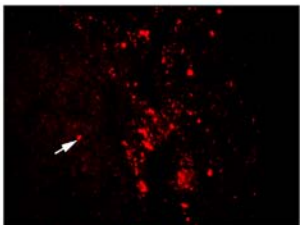

CD31

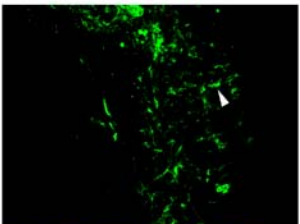

DAPI

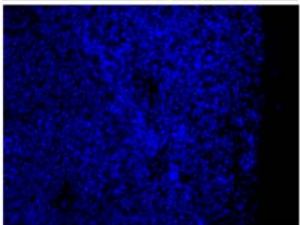

Merge

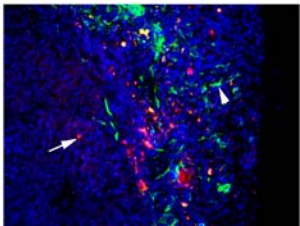

A

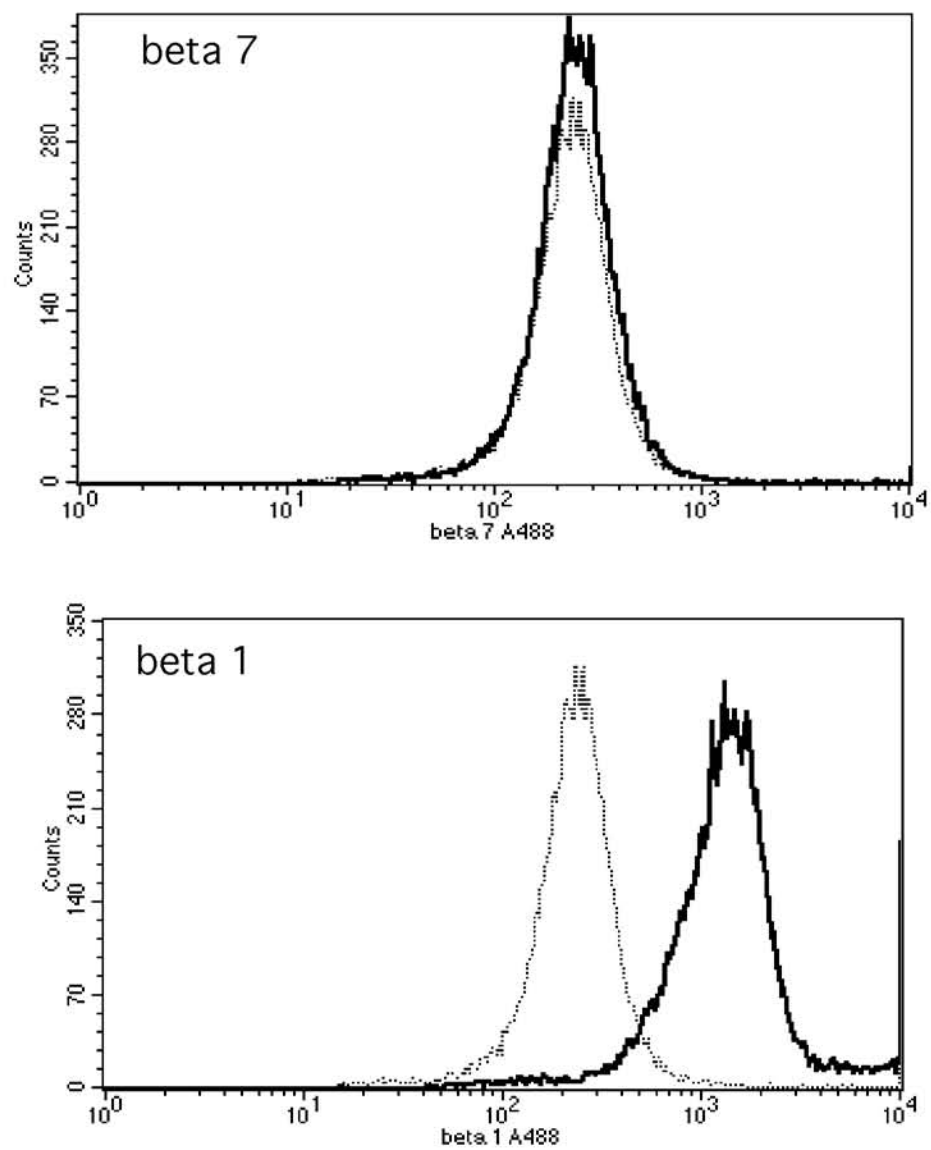

B

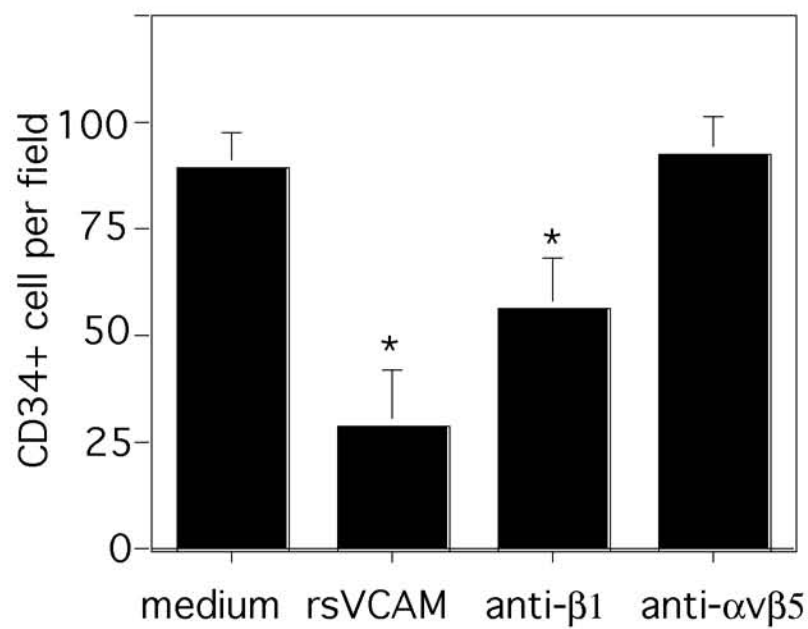

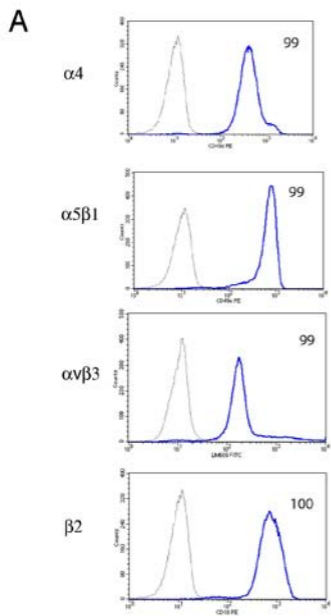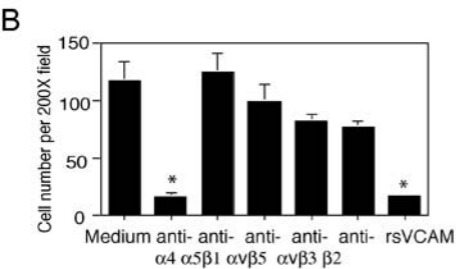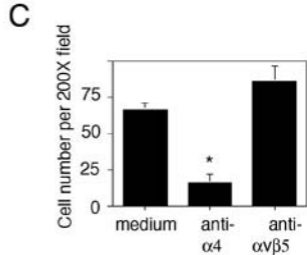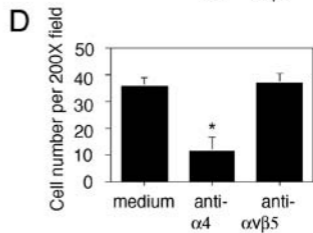

Supplementary Figure 3

LLC subcutaneous tumor

Lung

CD34 -

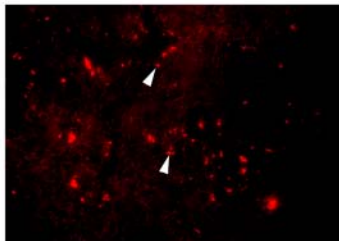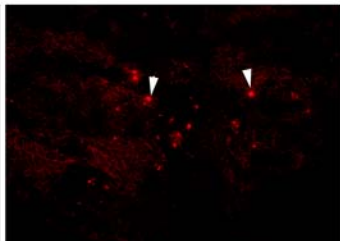

CD34+

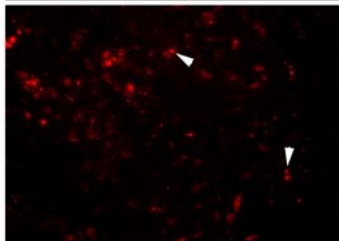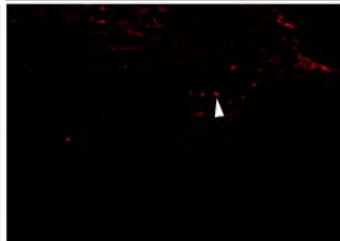

CHO $\alpha$ 4+

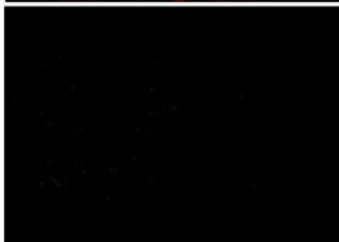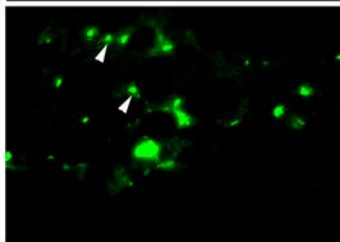

Supplementary Figure 4

**A**

Control IgG

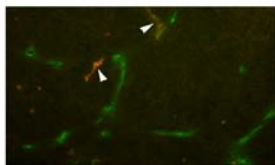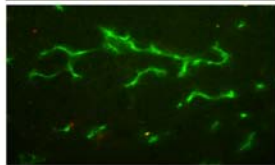anti- $\alpha$ 4**B**

CMTMR positive vessels/field

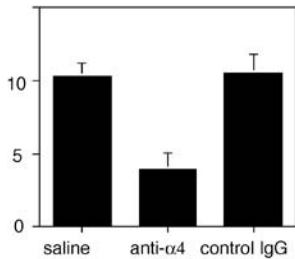**C**

CMTMR

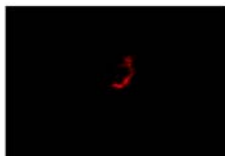

Ki67

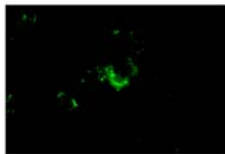

CD31

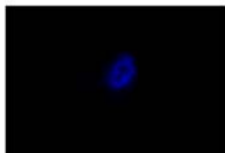

Merge

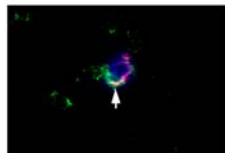

Supplementary Figure 6

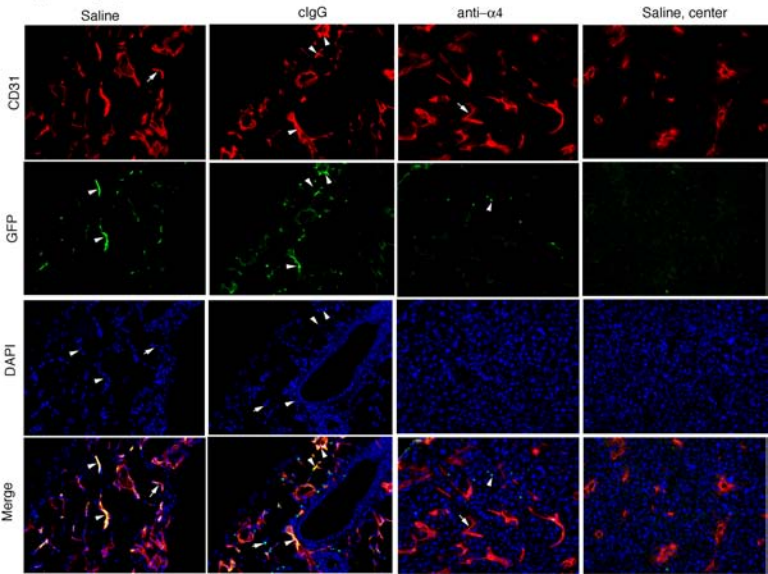

400X

600X

1000X

Brain

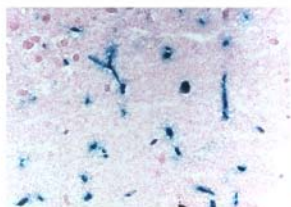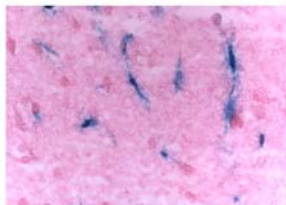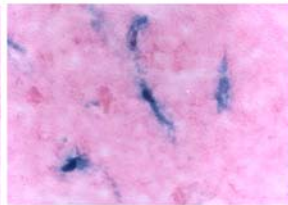

Liver

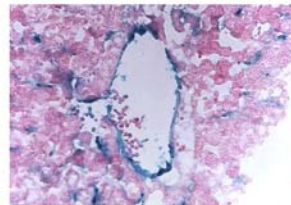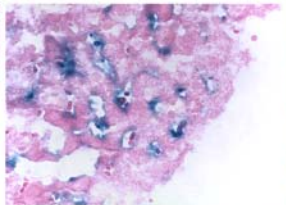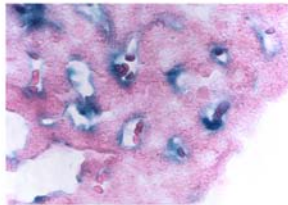

Spleen

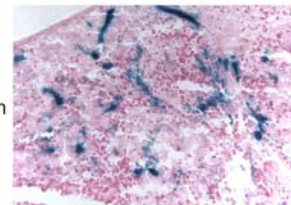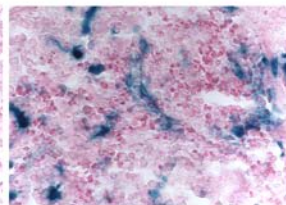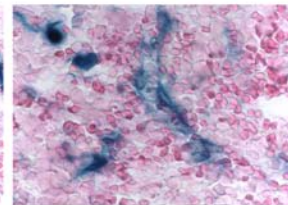

400X

1000X

betaGal

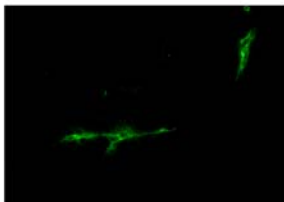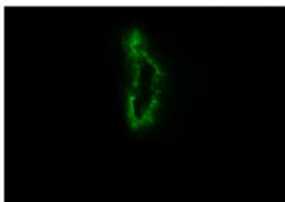

CD31

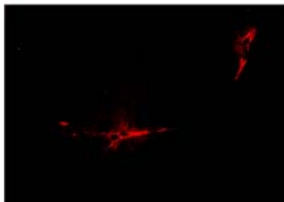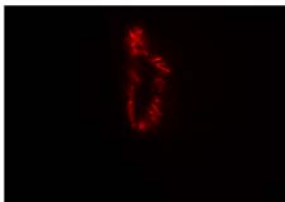

DAPI

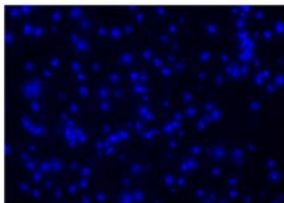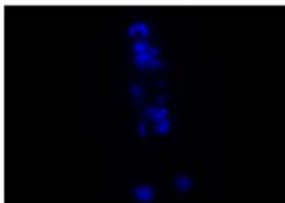

Merge

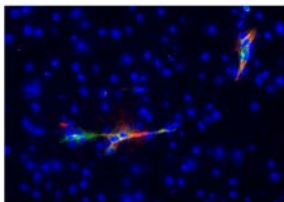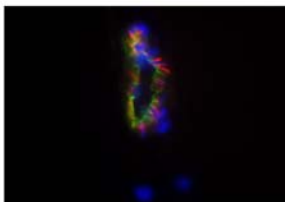



Supplementary Figure 9

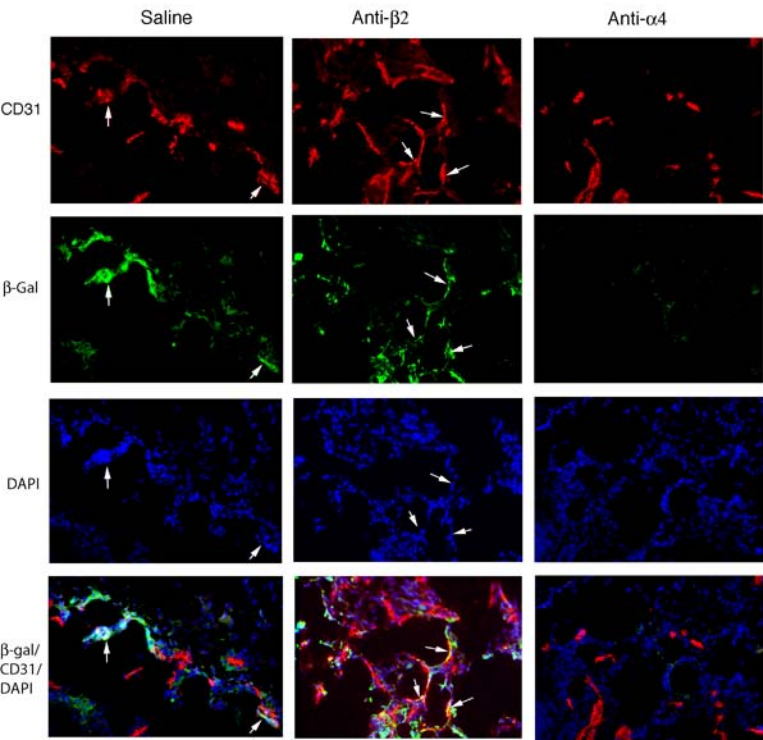

**Supplementary Figure 1: Individual images of homing of CD34+ cells to tumor periphery.** Five micron cryosections of the tumors from animals injected with CD34+ cells (red) were fixed in acetone, then incubated with DAPI (blue), rat anti-mouse CD31 and goat anti-rat FITC antibodies (green) and photographed at magnification 200X. Arrowheads indicate CD34+ cells. Arrows indicate CD31 positive blood vessels. Bar=50 $\mu$ m.

**Supplementary Figure 2: Expression and function of integrin  $\beta$ 1 and  $\beta$ 7 in human CD34+ cells.**

(A) FACS profiles for integrin  $\beta$ 1 and  $\beta$ 7 integrins on circulating CD34- cells. FACS profile in gray represents fluorescence of isotype control antibody. Percent positive cells is indicated by number in right hand corner of each profile.

(B) Average number of CD34- cells adhering to endothelial cell monolayers in the presence of medium, anti- $\beta$ 1, anti- $\alpha$ v $\beta$ 5 and rsVCAM per 200X microscopic field +/-SEM. Asterisks indicate  $P < 0.01$ .

**Supplementary Figure 3: Integrin expression and adhesion profiles of human CD34- cells**

(A) FACS profiles for integrin  $\alpha$ 4 $\beta$ 1,  $\alpha$ 5 $\beta$ 1,  $\alpha$ v $\beta$ 3 and  $\beta$ 2 integrins on circulating CD34- cells. FACS profile in gray represents fluorescence of isotype control antibody. Percent positive cells is indicated by number in right hand corner of each profile. (B) Average number of CD34- cells adhering to endothelial cell monolayers in the presence of medium, anti- $\alpha$ 4 $\beta$ 1, anti- $\alpha$ 5 $\beta$ 1,

anti- $\alpha$ v $\beta$ 5, anti- $\alpha$ v $\beta$ 3, anti- $\beta$ 2 and rsVCAM per 200X microscopic field +/-SEM. Asterisks indicate  $P < 0.01$ . (C-D) Average number of CD34- cells adhering to CS-1 fibronectin or (D) rsVCAM in the presence of medium, anti- $\alpha$ 4 $\beta$ 1 or isotype matched control antibody (cIgG, anti- $\alpha$ v $\beta$ 5) per 200X microscopic field +/-SEM. Asterisks indicate  $P < 0.01$ .

#### **Supplementary Figure 4: Mouse lung tissue from CD34+ cell injected animals**

Subcutaneous Lewis lung carcinoma (LLC) tumors and lung tissue from mice injected with  $0.5 \times 10^6$  CMTMR labeled CD34- cells, CMTMR labeled CD34+ cells or GFP+ $\alpha$ 4 $\beta$ 1+ Chinese hamster ovary cells (CHO $\alpha$ 4+). Note that many human CMTMR labeled cells (red, arrowheads) are present in tumors but few are present in lungs. No GFP+ $\alpha$ 4+ CHO cells are present in tumors while many GFP+ cells are present in lungs.

#### **Supplementary Figure 5: CD34+ cell contribution to angiogenesis is integrin $\alpha$ 4 $\beta$ 1 dependent**

(A) Cryosections from mice with subcutaneous HT29 colon carcinoma tumors that were injected with CMTMR labeled CD34+ cells (red) and treated with saline, anti-human integrin  $\alpha$ 4 $\beta$ 1 and anti-human  $\alpha$ v $\beta$ 5 for five days. After five days, animals were injected with fluorescent lectin *Bandeira simplicifolia* to highlight blood vessels (green). (B) Average number +/- SEM of CMTMR positive CD31+ blood vessels per 200x microscopic field for each treatment

group. (C) Cryosections from mice with subcutaneous Lewis lung carcinoma tumors that were injected with CMTMR labeled CD34+ cells (red) and sacrificed seven days later. Expression of Ki67 (green) in CMTMR (red) cells that formed CD31+ blood vessels (blue) in vivo.

#### **Supplementary Figure 6: Lin- cell contribution to angiogenesis**

Red (anti-CD31, arrows), green (EGFP, arrowheads) and blue (DAPI) color panels and merged images of cryosections of the periphery or center of LLC tumors from mice injected with EGFP+Lin- cells at 200X magnification. Peripheral tumor sections from animals were treated with saline, isotype matched, control anti-integrin antibodies (cIgG) or anti- $\alpha 4\beta 1$  antibodies are shown in the left three columns, while central tumor sections from saline treated mice are shown in the right column. EGFP+ blood vessels are yellow.

#### **Supplementary Figure 7: Tie2LacZ positive blood vessels**

Cryosections from Tie2LacZ mouse brain, liver, and spleen were stained to detect beta-galactosidase (blue) and counterstained with nuclear fast red. Images were captured at 400X, 600X and 1000X magnification.

#### **Supplementary Figure 8: LacZ+ cell contribution to angiogenesis**

Green (beta-galactosidase), red (CD31), blue (DAPI) and merged images of cryosections of bFGF saturated Matrigel from mice transplanted with Tie2LacZ bone marrow and treated with saline, anti- $\alpha 4\beta 1$  or control isotype

matched anti-integrin  $\beta$ 2 antibodies (cIgG). Cryosections were immunostained for beta-galactosidase to detect LacZ expressing cells (green), anti-CD31 to detect blood vessels (red) and DAPI to detect nuclei (blue). LacZ+/CD31+ vessels are yellow (arrows).

**Supplementary Figure 9: Immunostaining for LacZ+ cell contribution to angiogenesis**

Green (beta-galactosidase), red (CD31), blue (DAPI) and merged images of cryosections of Tie2LacZ mouse brain at 400 and 1000X. Cryosections were immunostained for beta-galactosidase to detect LacZ expressing cells (green), anti-CD31 to detect blood vessels (red) and DAPI to detect nuclei (blue). LacZ+/CD31+ vessels are yellow.
